# Supplementary material
Source: Springer Nature journal article supplement (https://www.springermedizin.de/resource/supplementary/12884_2010_351_MOESM1_ESM.pdf/9457508)

■ number of births assisted by midwives  
◆ number of midwives working in hospitals

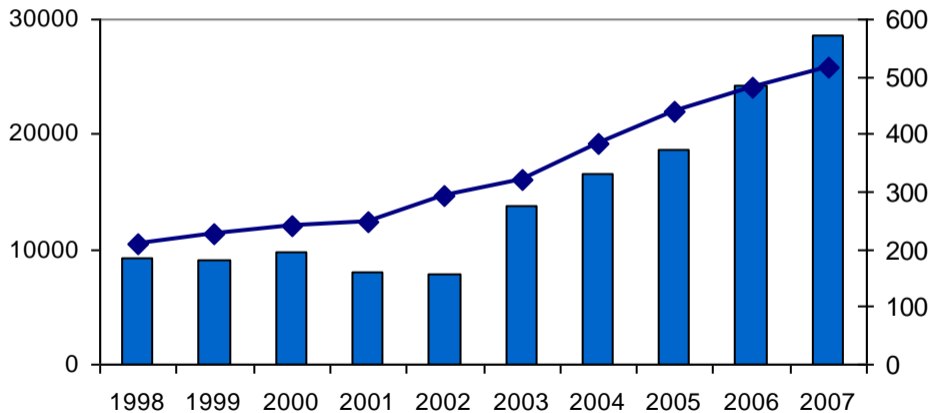

Supplement: MOESM1 [file 9457508]
